# Supplementary material for: Baseline 18F-FDG PET/CT Radiomics in Classical Hodgkin’s Lymphoma: The Predictive Role of the Largest and the Hottest Lesions
Source: MDPI journal article supplement (doi:10.3390/diagnostics13081391), 2023-04-11
Supplement: s1 [file s1]

**SUPPLEMENTAL TABLE S4.** Best bivariate radiomic models for Deauville Score prediction (Scanner\_1 images)

| Covariate 1                      | Covariate 2                         | mAUC* | SD† AUC |
|----------------------------------|-------------------------------------|-------|---------|
| Lesion_A.F_cm_merged.sum.entp    | Lesion_A.F_cm.auto.corr             | 0.951 | 0.0618  |
| TMTV‡                            | Lesion_A.F_cm.corr                  | 0.945 | 0.1419  |
| Lesion_A.F_cm.sum.var            | Lesion_A.F_cm_2.5D.energy           | 0.943 | 0.1495  |
| Lesion_A.F_cm.info.corr.2        | Lesion_A.F_cm_2.5D.corr             | 0.939 | 0.0977  |
| Lesion_A.F_stat.range            | Lesion_A.F_szm.zsnu                 | 0.937 | 0.2176  |
| Lesion_A.F_szm.zsnu              | Lesion_A.F_rlm_2.5D.hgre            | 0.931 | 0.1816  |
| TMTV                             | Lesion_A.F_szm.glnu.norm            | 0.925 | 0.0742  |
| Lesion_A.F_szm.zsnu              | Lesion_A.F_rlm_2.5D.gl.var          | 0.914 | 0.1263  |
| Lesion_A.F_cm.sum.var            | Lesion_A.F_cm_merged.clust.tend     | 0.912 | 0.0963  |
| TMTV                             | Lesion_A.F_cm.2.5Dmerged.clust.tend | 0.912 | 0.1133  |
| * Mean area under the ROC curve. |                                     |       |         |
| † Standard deviation.            |                                     |       |         |
| ‡ Total metabolic tumor volume.  |                                     |       |         |
