# Supplementary material for: Baseline 18F-FDG PET/CT Radiomics in Classical Hodgkin’s Lymphoma: The Predictive Role of the Largest and the Hottest Lesions
Source: MDPI journal article supplement (doi:10.3390/diagnostics13081391), 2023-04-11
Supplement: s1 [file s1]

**SUPPLEMENTAL TABLE S5.** Best bivariate models for 24-months progression free survival prediction

(Scanner\_2 images)

| <b>Covariate 1</b>               | <b>Covariate 2</b>             | <b>mAUC*</b> | <b>SD<sup>†</sup> AUC</b> |
|----------------------------------|--------------------------------|--------------|---------------------------|
| Lesion_B.F_szm.lzhge             | Lesion_A.F_rlm_rlnu.norm       | 0.873        | 0.147                     |
| Lesion_B.F_szm.glnu              | Lesion_B.Dmax                  | 0.873        | 0.167                     |
| Lesion_B.F_szm.lzhge             | Lesion_B.F_rlm.glnu            | 0.861        | 0.181                     |
| Lesion_B.F_stat.energy           | Lesion_B.F_rlm.2.5D.r.perc     | 0.860        | 0.142                     |
| Lesion_A.F_rlm.sre               | Lesion_B.F_rlm.2.5D.rl.ent     | 0.854        | 0.188                     |
| Lesion_B.F_stat.entropy          | Lesion_B.F_stat.Nic.entropy    | 0.852        | 0.164                     |
| Lesion_B.F_stat.entropy          | Lesion_B.F_rlm.2.5Dmerged.glnu | 0.846        | 0.144                     |
| Lesion_B.F_szm.z.ent             | Lesion_B.F_cm_2.5D.info.corr.1 | 0.845        | 0.185                     |
| Lesion_B.F_stat.energy           | Lesion_A.F_szm.2.5D.zs.var     | 0.844        | 0.150                     |
| Lesion_B.F_cm.info.corr.1        | Lesion_B.F_szm_2.5D.glnu.norm  | 0.844        | 0.140                     |
| * Mean area under the ROC curve. |                                |              |                           |
| † Standard deviation.            |                                |              |                           |
