# Supplementary material for: Baseline 18F-FDG PET/CT Radiomics in Classical Hodgkin’s Lymphoma: The Predictive Role of the Largest and the Hottest Lesions
Source: MDPI journal article supplement (doi:10.3390/diagnostics13081391), 2023-04-11
Supplement: s1 [file s1]

**SUPPLEMENTAL TABLE S3.** Best bivariate radiomic models for 24-months progression free survival prediction (whole cohort)

| <b>Covariate 1</b>            | <b>Covariate 2</b>            | <b>mAUC*</b> | <b>SD† AUC</b> |
|-------------------------------|-------------------------------|--------------|----------------|
| TMTV‡                         | Lesion_B.F_rlm.r.perc         | 0.744        | 0.1253         |
| Lesion_A.F_cm.2.5Dmerged.corr | Lesion_B.F_szm.szlge          | 0.730        | 0.0849         |
| TMTV                          | Lesion_B.F_morph.pca.least    | 0.729        | 0.0931         |
| TMTV                          | Lesion_A.F_cm.2.5Dmerged.corr | 0.710        | 0.0715         |
| TMTV                          | Lesion_B.F_morph.av           | 0.710        | 0.0812         |
| Lesion_B.F_rlm.r.perc         | Lesion_B.F_cm.energy          | 0.706        | 0.0899         |
| TMTV                          | Lesion_B.F_morph.pca.minor    | 0.703        | 0.1058         |
| TMTV                          | Lesion_B.F_rlm.lre            | 0.702        | 0.1086         |
| Lesion_B.F_cm.sum.ent         | Lesion_B.F_rlm.rlnu.norm      | 0.702        | 0.1011         |

\* Mean area under the ROC curve.

† Standard deviation.

‡ Total metabolic tumor volume.
