# Supplementary material for: Baseline 18F-FDG PET/CT Radiomics in Classical Hodgkin’s Lymphoma: The Predictive Role of the Largest and the Hottest Lesions
Source: MDPI journal article supplement (doi:10.3390/diagnostics13081391), 2023-04-11
Supplement: s1 [file s1]

**SUPPLEMENTAL TABLE S1.** Radiomic features classes and their components, extracted from Lesion\_A and Lesion\_B through Moddicom software

| IBSI* Class                                                                                                               | Features               |                             |                               |                                   |
|---------------------------------------------------------------------------------------------------------------------------|------------------------|-----------------------------|-------------------------------|-----------------------------------|
| Aggregation method                                                                                                        | Averaged               | 2.5 D (direction merged)    | Merged                        | 2.5 D, Merged                     |
| <b>Morphological</b>                                                                                                      | F_morph.surface        |                             |                               |                                   |
|                                                                                                                           | F_morph.volume         |                             |                               |                                   |
|                                                                                                                           | F_morph.av             |                             |                               |                                   |
|                                                                                                                           | F_morph.comp.1         |                             |                               |                                   |
|                                                                                                                           | F_morph.comp.2         |                             |                               |                                   |
|                                                                                                                           | F_morph.sph.dispr      |                             |                               |                                   |
|                                                                                                                           | F_morph.sphericity     |                             |                               |                                   |
|                                                                                                                           | F_morph.asphericity    |                             |                               |                                   |
|                                                                                                                           | F_morph.com            |                             |                               |                                   |
|                                                                                                                           | F_morph.pca.major      |                             |                               |                                   |
|                                                                                                                           | F_morph.pca.minor      |                             |                               |                                   |
|                                                                                                                           | F_morph.pca.least      |                             |                               |                                   |
|                                                                                                                           | F_morph.pca.elongation |                             |                               |                                   |
|                                                                                                                           | F_morph.pca.flatness   |                             |                               |                                   |
| <b>Intensity-based statistical</b>                                                                                        | F_stat.mean            |                             |                               |                                   |
|                                                                                                                           | F_stat.var             |                             |                               |                                   |
|                                                                                                                           | F_stat.skew            |                             |                               |                                   |
|                                                                                                                           | F_stat.kurt            |                             |                               |                                   |
|                                                                                                                           | F_stat.median          |                             |                               |                                   |
|                                                                                                                           | F_stat.min             |                             |                               |                                   |
|                                                                                                                           | F_stat.10thpercentile  |                             |                               |                                   |
|                                                                                                                           | F_stat.90thpercentile  |                             |                               |                                   |
|                                                                                                                           | F_stat.max             |                             |                               |                                   |
|                                                                                                                           | F_stat.iqr             |                             |                               |                                   |
|                                                                                                                           | F_stat.range           |                             |                               |                                   |
|                                                                                                                           | F_stat.mad             |                             |                               |                                   |
|                                                                                                                           | F_stat.rmad            |                             |                               |                                   |
|                                                                                                                           | F_stat.energy          |                             |                               |                                   |
|                                                                                                                           | F_stat.rms             |                             |                               |                                   |
| <b>Intensity-histogram</b>                                                                                                | F_stat.entropy         |                             |                               |                                   |
|                                                                                                                           | F_stat.uniformity      |                             |                               |                                   |
| <b>GLCM†</b><br>Presents the number of times that two intensity levels have occurred in two pixels with specific distance | F_cm.joint.max         | F_cm_2.5D.joint.max         | F_cm_merged.joint.max         | F_cm.2.5Dmerged.joint.max         |
|                                                                                                                           | F_cm.joint.avg         | F_cm_2.5D.joint.avg         | F_cm_merged.joint.avg         | F_cm.2.5Dmerged.joint.avg         |
|                                                                                                                           | F_cm.joint.var         | F_cm_2.5D.joint.var         | F_cm_merged.joint.var         | F_cm.2.5Dmerged.joint.var         |
|                                                                                                                           | F_cm.joint.ent         | F_cm_2.5D.joint.ent         | F_cm_merged.joint.ent         | F_cm.2.5Dmerged.joint.ent         |
|                                                                                                                           | F_cm.diff.avg          | F_cm_2.5D.diff.avg          | F_cm_merged.diff.avg          | F_cm.2.5Dmerged.diff.avg          |
|                                                                                                                           | F_cm.diff.var          | F_cm_2.5D.diff.var          | F_cm_merged.diff.var          | F_cm.2.5Dmerged.diff.var          |
|                                                                                                                           | F_cm.diff.ent          | F_cm_2.5D.diff.ent          | F_cm_merged.diff.ent          | F_cm.2.5Dmerged.diff.ent          |
|                                                                                                                           | F_cm.sum.avg           | F_cm_2.5D.sum.avg           | F_cm_merged.sum.avg           | F_cm.2.5Dmerged.sum.avg           |
|                                                                                                                           | F_cm.sum.var           | F_cm_2.5D.sum.var           | F_cm_merged.sum.var           | F_cm.2.5Dmerged.sum.var           |
|                                                                                                                           | F_cm.sum.ent           | F_cm_2.5D.sum.ent           | F_cm_merged.sum.ent           | F_cm.2.5Dmerged.sum.ent           |
|                                                                                                                           | F_cm.energy            | F_cm_2.5D.energy            | F_cm_merged.energy            | F_cm.2.5Dmerged.energy            |
|                                                                                                                           | F_cm.contrast          | F_cm_2.5D.contrast          | F_cm_merged.contrast          | F_cm.2.5Dmerged.contrast          |
|                                                                                                                           | F_cm.dissimilarity     | F_cm_2.5D.dissimilarity     | F_cm_merged.dissimilarity     | F_cm.2.5Dmerged.dissimilarity     |
|                                                                                                                           | F_cm.inv.diff          | F_cm_2.5D.inv.diff          | F_cm_merged.inv.diff          | F_cm.2.5Dmerged.inv.diff          |
|                                                                                                                           | F_cm.inv.diff.norm     | F_cm_2.5D.inv.diff.norm     | F_cm_merged.inv.diff.norm     | F_cm.2.5Dmerged.inv.diff.norm     |
|                                                                                                                           | F_cm.inv.diff.mom      | F_cm_2.5D.inv.diff.mom      | F_cm_merged.inv.diff.mom      | F_cm.2.5Dmerged.inv.diff.mom      |
|                                                                                                                           | F_cm.inv.diff.mom.norm | F_cm_2.5D.inv.diff.mom.norm | F_cm_merged.inv.diff.mom.norm | F_cm.2.5Dmerged.inv.diff.mom.norm |
|                                                                                                                           | F_cm.inv.var           | F_cm_2.5D.inv.var           | F_cm_merged.inv.var           | F_cm.2.5Dmerged.inv.var           |
|                                                                                                                           | F_cm.corr              | F_cm_2.5D.corr              | F_cm_merged.corr              | F_cm.2.5Dmerged.corr              |
|                                                                                                                           | F_cm.auto.corr         | F_cm_2.5D.auto.corr         | F_cm_merged.auto.corr         | F_cm.2.5Dmerged.auto.corr         |
| <b>GLRLM‡</b><br>Presents the length of consecutive pixels having the same intensity                                      | F_cm.clust.tend        | F_cm_2.5D.clust.tend        | F_cm_merged.clust.tend        | F_cm.2.5Dmerged.clust.tend        |
|                                                                                                                           | F_cm.clust.shade       | F_cm_2.5D.clust.shade       | F_cm_merged.clust.shade       | F_cm.2.5Dmerged.clust.shade       |
|                                                                                                                           | F_cm.clust.prom        | F_cm_2.5D.clust.prom        | F_cm_merged.clust.prom        | F_cm.2.5Dmerged.clust.prom        |
|                                                                                                                           | F_cm.info.corr.1       | F_cm_2.5D.info.corr.1       | F_cm_merged.info.corr.1       | F_cm.2.5Dmerged.info.corr.1       |
|                                                                                                                           | F_cm.info.corr.2       | F_cm_2.5D.info.corr.2       | F_cm_merged.info.corr.2       | F_cm.2.5Dmerged.info.corr.2       |
|                                                                                                                           | F_rlm.sre              | F_rlm_2.5D.sre              |                               | F_rlm.2.5Dmerged.sre              |
|                                                                                                                           | F_rlm.lre              | F_rlm_2.5D.lre              |                               | F_rlm.2.5Dmerged.lre              |
|                                                                                                                           | F_rlm.lgre             | F_rlm_2.5D.lgre             |                               | F_rlm.2.5Dmerged.lgre             |
|                                                                                                                           | F_rlm.hgre             | F_rlm_2.5D.hgre             |                               | F_rlm.2.5Dmerged.hgre             |
|                                                                                                                           | F_rlm.srlge            | F_rlm_2.5D.srlge            |                               | F_rlm.2.5Dmerged.srlge            |
|                                                                                                                           | F_rlm.srhge            | F_rlm_2.5D.srhge            |                               | F_rlm.2.5Dmerged.srhge            |
|                                                                                                                           | F_rlm.lrlge            | F_rlm_2.5D.lrlge            |                               | F_rlm.2.5Dmerged.lrlge            |
|                                                                                                                           | F_rlm.lrhge            | F_rlm_2.5D.lrhge            |                               | F_rlm.2.5Dmerged.lrhge            |
|                                                                                                                           | F_rlm.glnu             | F_rlm_2.5D.glnu             |                               | F_rlm.2.5Dmerged.glnu             |

|                                                                                        |                                                                                                                                                                                                                                                    |                                                                                                                                                                                                                                                                                                                                   |                                                                                                                                                                                                |
|----------------------------------------------------------------------------------------|----------------------------------------------------------------------------------------------------------------------------------------------------------------------------------------------------------------------------------------------------|-----------------------------------------------------------------------------------------------------------------------------------------------------------------------------------------------------------------------------------------------------------------------------------------------------------------------------------|------------------------------------------------------------------------------------------------------------------------------------------------------------------------------------------------|
|                                                                                        | F_rlm.glnu.norm<br>F_rlm.rlnu<br>F_rlm.rlnu.norm<br>F_rlm.r.perc<br>F_rlm.gl.var<br>F_rlm.rl.var<br>F_rlm.rl.entr                                                                                                                                  | F_rlm_2.5D.glnu.norm<br>F_rlm_2.5D.rlnu<br>F_rlm_2.5D.rlnu.norm<br>F_rlm_2.5D.r.perc<br>F_rlm_2.5D.gl.var<br>F_rlm_2.5D.rl.var<br>F_rlm_2.5D.rl.entr<br>F_rlm_25D_merged.dfge                                                                                                                                                     | F_rlm.2.5Dmerged.glnu.norm<br>F_rlm.2.5Dmerged.rlnu<br>F_rlm.2.5Dmerged.rlnu.norm<br>F_rlm.2.5Dmerged.r.perc<br>F_rlm.2.5Dmerged.gl.var<br>F_rlm.2.5Dmerged.rl.var<br>F_rlm.2.5Dmerged.rl.entr |
| <b>GLSZM<sup>§</sup></b><br>Considers the size of homogeneous zones in every dimension | F_szm.size<br>F_szm.lze<br>F_szm.lgze<br>F_szm.hgze<br>F_szm.szlge<br>F_szm.szhge<br>F_szm.lzlge<br>F_szm.lzhge<br>F_szm.glnu<br>F_szm.glnu.norm<br>F_szm.zsnu,<br>F_szm.zsnu.norm<br>F_zsm.z.perc<br>F_szm.gl.var<br>F_szm.zs.var<br>F_szm.z.entr | F_szm_2.5D.size<br>F_szm_2.5D.lze<br>F_szm_2.5D.lgze<br>F_szm_2.5D.hgze<br>F_szm_2.5D.szlge<br>F_szm_2.5D.szhge<br>F_szm_2.5D.lzlge<br>F_szm_2.5D.lzhge<br>F_szm_2.5D.glnu<br>F_szm_2.5D.glnu.norm<br>F_szm_2.5D.zsnu<br>F_szm_2.5D.zsnu.norm<br>F_zsm_2.5D.z.perc<br>F_szm_2.5D.gl.var<br>F_szm_2.5D.zs.var<br>F_szm_2.5D.z.entr |                                                                                                                                                                                                |

\*: Image biomarker standardization initiative
†: Grey Level Co-occurrence Matrix-based features.
‡: Grey Level Run Length Matrix-based features.
§: Grey Level Size Zone Matrix-based features.
