# Supplementary material for: Baseline 18F-FDG PET/CT Radiomics in Classical Hodgkin’s Lymphoma: The Predictive Role of the Largest and the Hottest Lesions
Source: MDPI journal article supplement (doi:10.3390/diagnostics13081391), 2023-04-11
Supplement: s1 [file s1]

**SUPPLEMENTAL TABLE S2.** Best bivariate radiomic models for Deauville Score prediction (whole cohort)

| <b>Covariate 1</b>               | <b>Covariate 2</b>             | <b>mAUC*</b> | <b>SD<sup>†</sup> AUC</b> |
|----------------------------------|--------------------------------|--------------|---------------------------|
| Lesion_A.F_cm_2.5D.corr          | Lesion_B.F_cm.joint.entr       | 0.782        | 0.0535                    |
| Lesion_A.F_cm.2.5Dmerged.corr    | Lesion_B.F_cm.joint.entr       | 0.778        | 0.0792                    |
| Lesion_A.F_szm_2.5D.lze          | Lesion_B.F_cm.joint.entr       | 0.773        | 0.1103                    |
| Lesion_A.F_rlm.glnu              | Lesion_B.F_cm.joint.entr       | 0.772        | 0.1166                    |
| Lesion_A.F_rlm.lre               | Lesion_B.F_cm_2.5D.corr        | 0.770        | 0.0811                    |
| Lesion_A.F_rlm.rlnu              | Lesion_A.F_stat.uniformity     | 0.769        | 0.1395                    |
| TMTV <sup>‡</sup>                | Lesion_A.F_rlm.lgre            | 0.763        | 0.0849                    |
| TMTV                             | Lesion_A.F_morph.surface       | 0.761        | 0.0979                    |
| TMTV                             | Lesion_B.F_cm_2.5D.joint.entr  | 0.756        | 0.0909                    |
| Lesion_A.F_cm_2.5D.corr          | Lesion_A.F_rlm.2.5Dmerged.rlnu | 0.752        | 0.0454                    |
| * Mean area under the ROC curve. |                                |              |                           |
| † Standard deviation.            |                                |              |                           |
| ‡ Total metabolic tumor volume.  |                                |              |                           |
